# Supplementary material for: Properties of a Single Amino Acid Residue in the Third Transmembrane Domain Determine the Kinetics of Ambient Light-Sensitive Channelrhodopsin
Source: MDPI journal article supplement (doi:10.3390/ijms24055054), 2023-03-06
Supplement: s1 [file s1]

## Supplementary materials

**a**

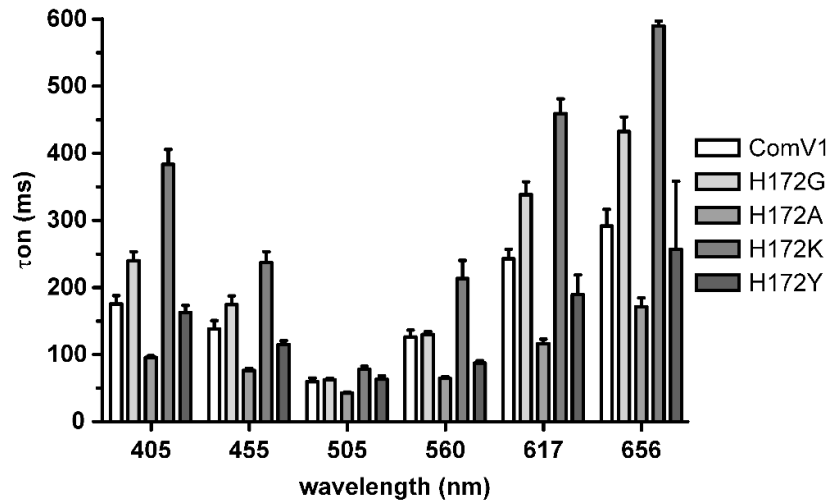

**b**

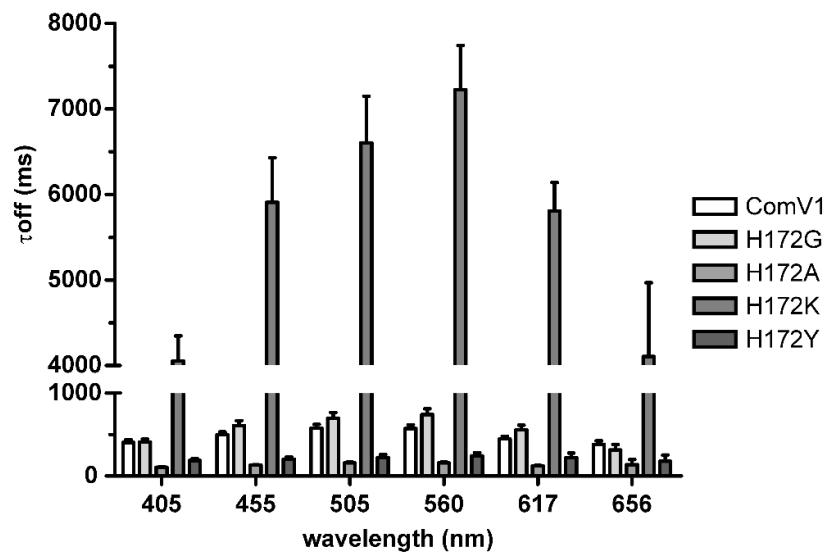

Figure S1 Comparison between ComV1 and its mutants

Comparison of  $\tau_{on}$  (a) and  $\tau_{off}$  (b) between ComV1 and its mutants. The data are shown as mean  $\pm$  SEM (ComV1  $n = 18-19$ , H172G  $n = 8$ , H172A  $n = 8$ , H172K  $n = 8$ , H172Y  $n = 8$ ). The data were analyzed using Dunnett's multiple comparison test; they are presented in Table S1 (\* $p < 0.05$ , \*\* $p < 0.01$ ).

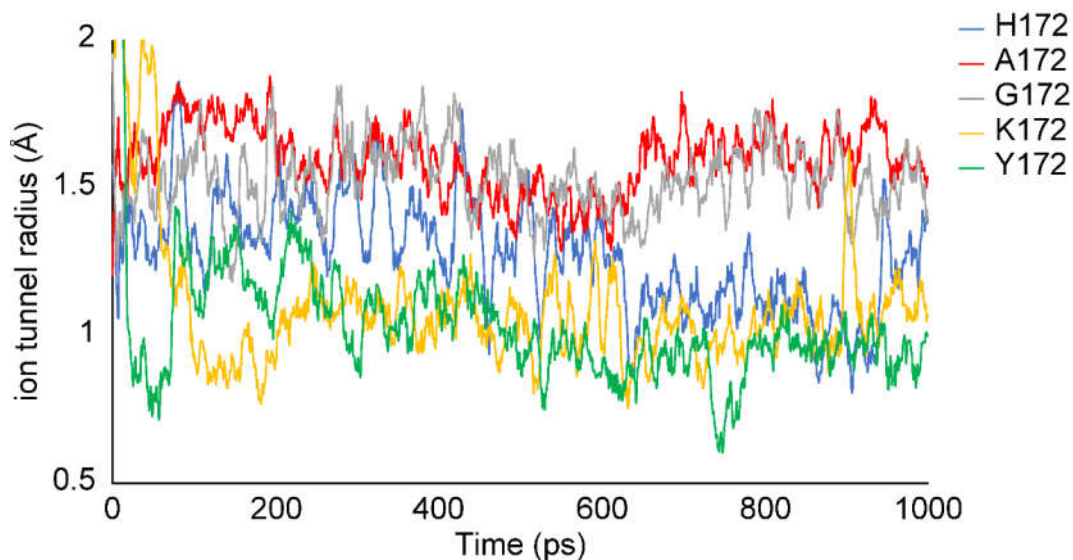

Figure S2 Structural analysis with MD simulation

Comparison of ion tunnel radius in the ground state between ComV1 and its mutants. The first structural model was built with homology modelling using the structure of PDBID: 4YZI as the template.

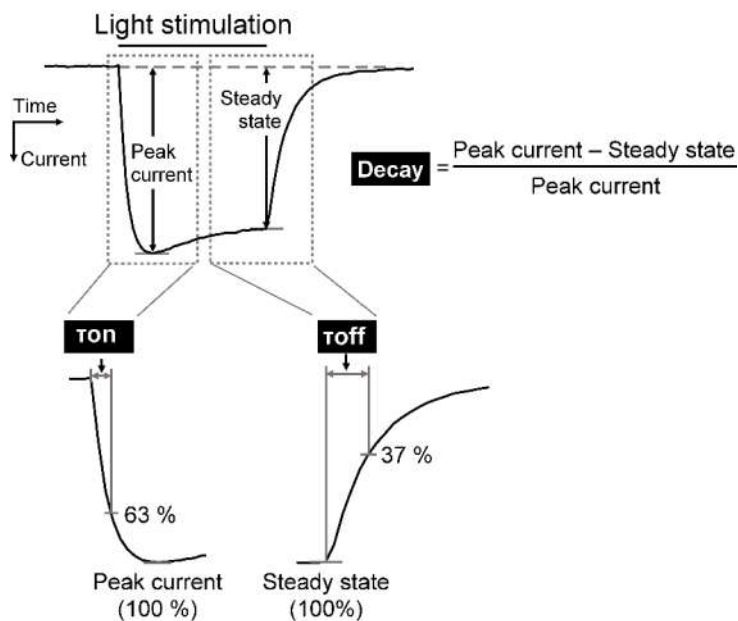

Figure S3 Graphical description of  $\tau_{on}$ ,  $\tau_{off}$ , and decay

$\tau_{on}$  is the time for the photocurrent to reach 63% of the peak current and  $\tau_{off}$  is the time for the photocurrent to reduce to 37% of the steady-state current. Decay is the value obtained by dividing the difference between the peak current and steady-state current by the peak current.

Table S1 Statistical analysis of photocurrent of each channelrhodopsin stimulated by light of various wavelengths in Fig. 2d.

One-way ANOVA with Dunnett's multiple comparison test vs. ComV1 (\* $p < 0.05$ , \*\* $p < 0.01$ ).

| Photocurrent | p-value summary |        |        |        |        |        |
|--------------|-----------------|--------|--------|--------|--------|--------|
|              | 405 nm          | 455 nm | 505 nm | 560 nm | 617 nm | 656 nm |
| H172G        |                 |        |        |        |        |        |
| H172A        | **              | **     | **     | *      | **     | *      |
| H172K        |                 |        | **     | *      |        | **     |
| H172Y        | **              | **     | **     | **     | **     | **     |

Table S2 Statistical analysis of  $\tau_{on}$  of each channelrhodopsin stimulated by light of various wavelengths in Fig. S2a.

One-way ANOVA with Dunnett's multiple comparison test vs. ComV1 (\* $p < 0.05$ , \*\* $p < 0.01$ ).

| $\tau_{on}$ | p-value summary |        |        |        |        |        |
|-------------|-----------------|--------|--------|--------|--------|--------|
|             | 405 nm          | 455 nm | 505 nm | 560 nm | 617 nm | 656 nm |
| H172G       | **              |        |        |        | **     |        |
| H172A       | **              | **     | *      | **     | **     |        |
| H172K       | **              | **     | *      | **     | **     | **     |
| H172Y       |                 |        |        |        |        |        |

Table S3 Statistical analysis of  $\tau_{off}$  of each channelrhodopsin stimulated by light of various wavelengths in Fig. S2b.

One-way ANOVA with Dunnett's multiple comparison test vs. ComV1 (\* $p < 0.05$ , \*\* $p < 0.01$ ).

| $\tau_{off}$ | p-value summary |        |        |        |        |        |
|--------------|-----------------|--------|--------|--------|--------|--------|
|              | 405 nm          | 455 nm | 505 nm | 560 nm | 617 nm | 656 nm |
| H172G        |                 |        |        |        |        |        |
| H172A        |                 |        |        |        |        |        |
| H172K        | **              | **     | **     | **     | **     | **     |
| H172Y        |                 |        |        |        |        |        |

Table S4                      The sequences of primers used PCR for producing mutants

|       | Forward                    | Reverse                    |
|-------|----------------------------|----------------------------|
| H172R | CGCCTGAGCAACCTGACCGGCCTGAA | GATCAGGATCACAGGACAGGTCAGCA |
| H172G | GGACTGAGCAACCTGACCGGCCTGAA | GATCAGGATCACAGGACAGGTCAGCA |
| H172A | GCCCTGAGCAACCTGACCGGCCTGAA | GATCAGGATCACAGGACAGGTCAGCA |
| H172K | AAACTGAGCAACCTGACCGGCCTGAA | GATCAGGATCACAGGACAGGTCAGCA |
| H172Y | TACCTGAGCAACCTGACCGGCCTGAA | GATCAGGATCACAGGACAGGTCAGCA |
